# Supplementary material
Source: PubMed Central journal article supplement (PMC7041581)

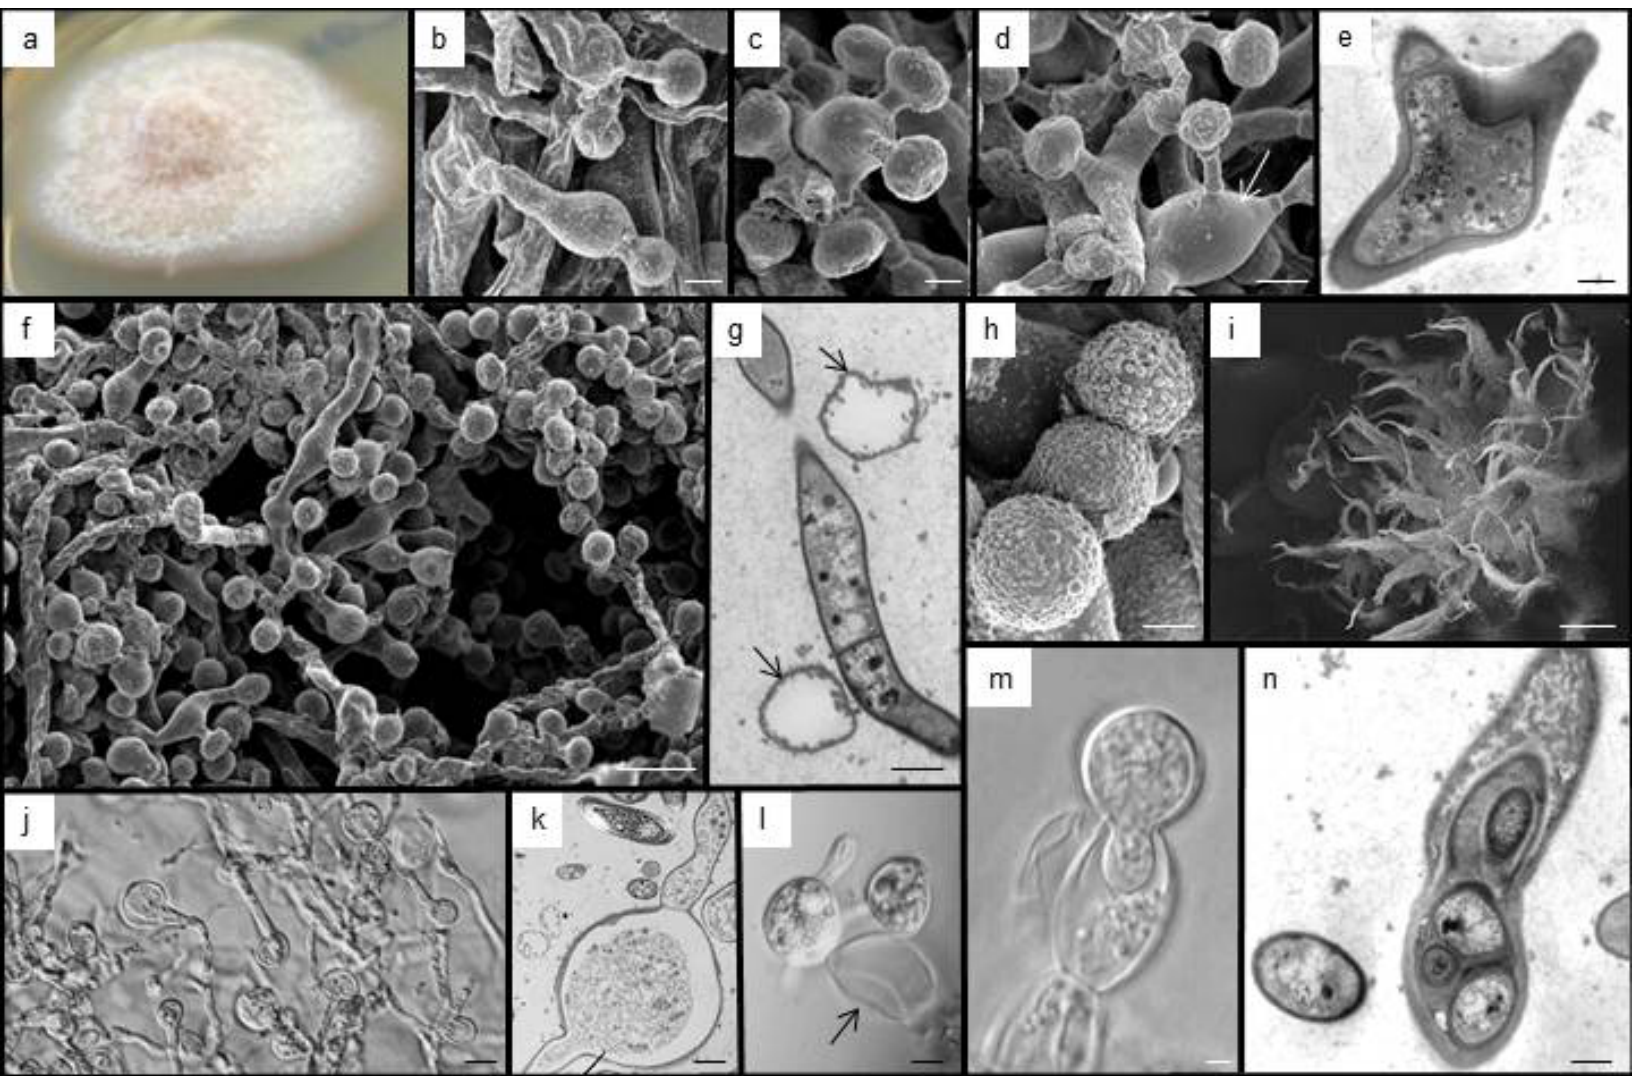

Supplement: JCM.01661-19-so002.pdf [file JCM.01661-19-so002.pdf]

ITS

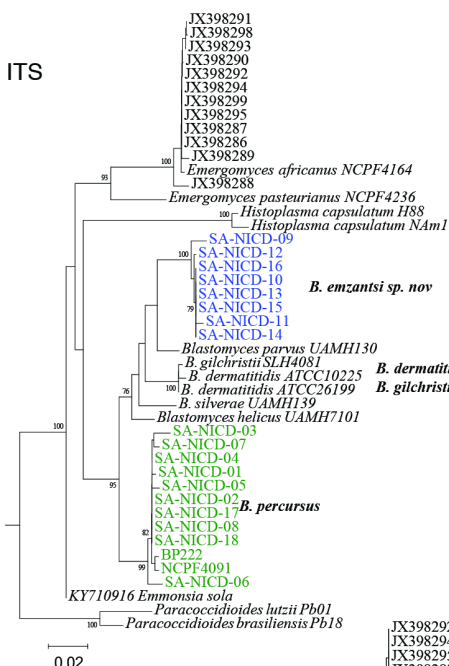

LSU

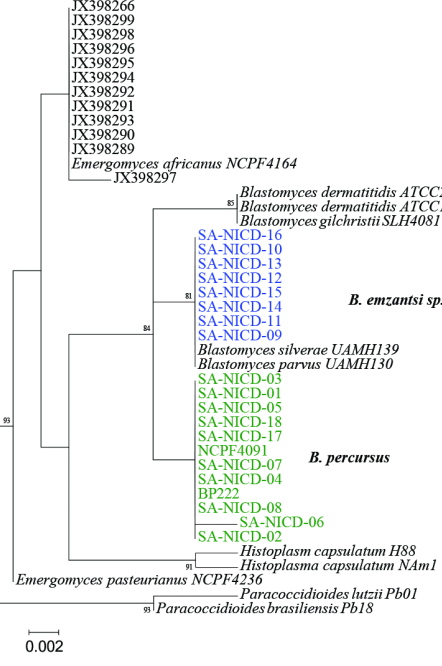

PRP8

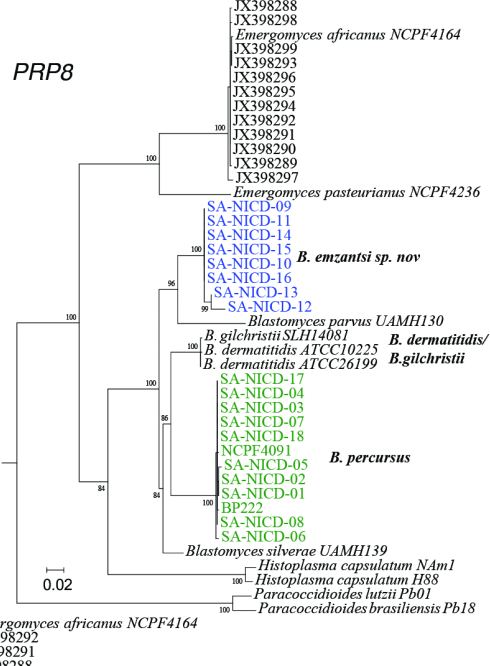

β-tubulin

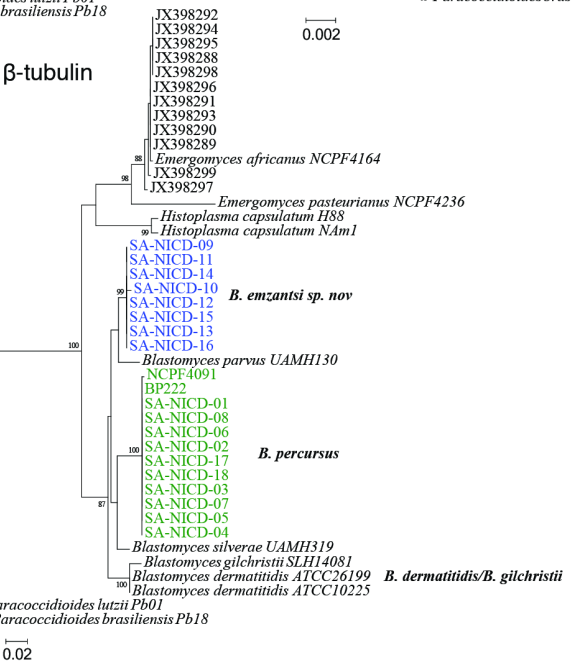

Actin

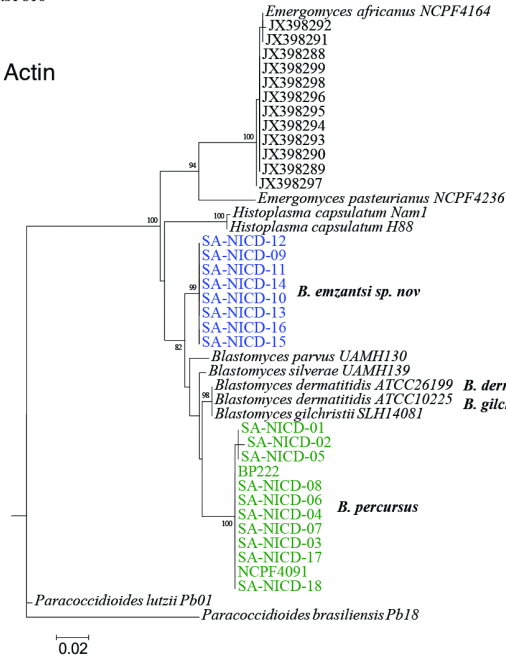

Supplement: JCM.01661-19-so003.pdf [file JCM.01661-19-so003.pdf]
